# Supplementary material for: Identification of Novel Pepper Genes Involved in Bax- or INF1-Mediated Cell Death Responses by High-Throughput Virus-Induced Gene Silencing
Source: Int J Mol Sci. 2013 Nov 19;14(11):22782–95. doi: 10.3390/ijms141122782 (PMC3856090; doi:10.3390/ijms141122782)

# Supplementary Information

**Table S1.** Putative pepper EST homologs identified in *Nicotiana benthamiana*.

| Pepper EST ID | <i>N. benthamiana</i> homolog * | E-value   | Annotation                                              |
|---------------|---------------------------------|-----------|---------------------------------------------------------|
| KS01044F10    | lcl Nb3K585732136               | 0.00E+00  | Luminal-binding protein 5 (BiP 5), Precursor            |
| KS01047B03    | lcl Nb3K745624312               | 4.00E-75  | Acyl carrier protein 4, chloroplastic (ACP), Precursor  |
| KS08008G04    | lcl Nb3K645786840               | 2.00E-47  | 60S ribosomal protein L10                               |
| KS08010H01    | lcl Nb3K725838694               | 1.00E-53  | Pectate lyase, Precursor                                |
| KS01057F02    | lcl Nb3K725838062               | 5.00E-31  | Epidermis-specific secreted glycoprotein EP1, Precursor |
| KS01006G03    | lcl Nb3K585739567               | 4.00E-43  | Probable calcium-binding protein CML45                  |
| KS01043D02    | lcl Nb3K645789478               | 1.00E-159 | Zinc finger CCCH domain-containing protein 29 (AtC3H29) |

\* BLAST hit at <http://benth-web-pro-1.ucc.usyd.edu.au/blast/blast.php>.

**Table S2.** Primer sequences for semi-quantitative RT-PCR.

| Primers                    | Sequences (5' to 3')  |
|----------------------------|-----------------------|
| <i>lcl Nb3K585732136 F</i> | CCACTTACTCGGGCTCGTTT  |
| <i>lcl Nb3K585732136 R</i> | AGGGTTGACACCCTTGTTGG  |
| <i>lcl Nb3K745624312 F</i> | ACTTGACCCCGTGTCACCTG  |
| <i>lcl Nb3K745624312 R</i> | GCTTCCTCAAGTCCCATGACA |
| <i>lcl Nb3K645786840 F</i> | GTGCTCGTGTTGCAATTGGT  |
| <i>lcl Nb3K645786840 R</i> | GATCTTTTGTGCGGCCAGGGA |
| <i>lcl Nb3K725838694 F</i> | TATCGATGCTGTCGCTGCTT  |
| <i>lcl Nb3K725838694 R</i> | TCCACTGCTTCCGCCAATAG  |
| <i>lcl Nb3K725838062 F</i> | TATCATGCGCTGGGTATGGG  |
| <i>lcl Nb3K725838062 R</i> | GGGTGTCGGTGGGATAATCG  |
| <i>lcl Nb3K585739567 F</i> | CTCCACCTCTTCCCTGCATA  |
| <i>lcl Nb3K585739567 R</i> | ACAAAAATGGCGGCTCCTAGT |
| <i>lcl Nb3K645789478 F</i> | CTTTTGCAAAGCAGCGGAGT  |
| <i>lcl Nb3K645789478 R</i> | TGTCCTCGCTATTGAAGCCC  |
| <i>NbActin F</i>           | TGGAATCTGGTGATGGTGTG  |
| <i>NbActin R</i>           | CCTCCAATCCAAACACTGTA  |

**Figure S1.** Suppression of homologous gene expression in silenced *N. benthamiana* plants. Transcript levels of each gene were analyzed by RT-PCR. Total RNAs were extracted from leaf tissues of GFP-control or gene-silenced plants at 24 h after Bax inoculation. RNA (1 µg) was used in cDNA synthesis and PCR was performed using the primers described in the Supplemental Table S2. PCR products were sampled from each PCR cycle number indicated at the top and were separated on an agarose gel and stained with ethidium bromide.

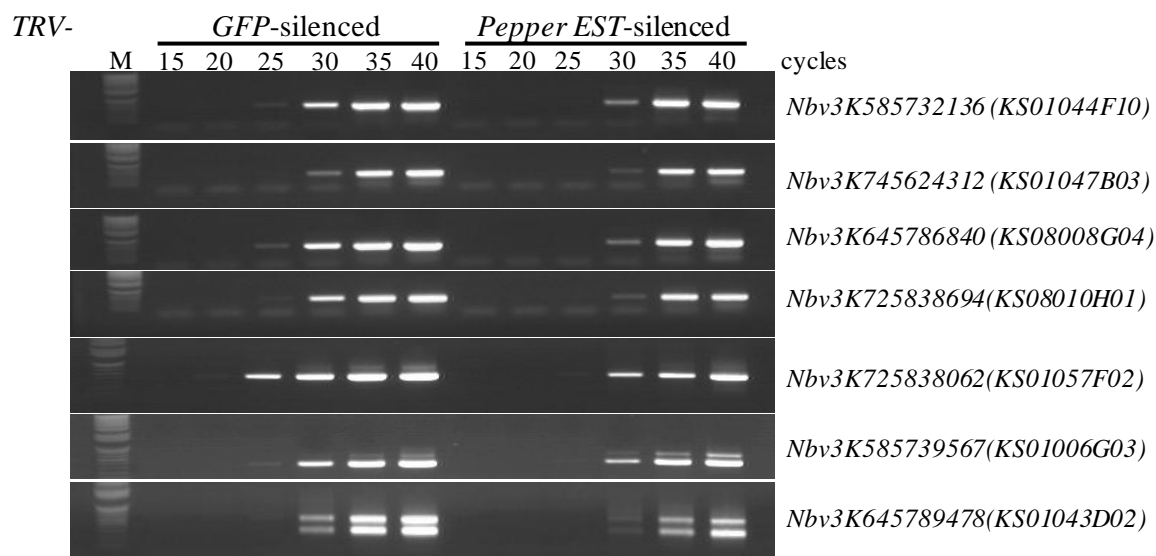

Supplement: Supplementary file 1 [file ijms-14-22782-s001.pdf]
